# Supplementary material for: Estimating the Quantitative Relationship of Disease Control and Spouse Control for Lung Cancer in Case-control Study by Cross-walk Model
Source: Research Square preprint supplement (doi:10.21203/rs.3.rs-7772697/v1), 2025-11-18
Supplement: Supplementary file 1 [file 61e3c74b5a1b5af07dd69c1f.docx]

Tables

Table 1 Demographic characteristics of participants

| Variate | Male | | | Female | | |
| --- | --- | --- | --- | --- | --- | --- |
| Case (%) | SC (%) | DC (%) | Case (%) | SC (%) | DC (%) |
| Total | 34825 | 7438 | 117963 | 16392 | 22433 | 97055 |
| Educational degree |  |  |  |  |  |  |
| High | 10058(28.88) | 1341(18.03) | 26117(22.14) | 2144(13.08) | 6955(31.00) | 8634(8.90) |
| Low | 24767(71.12) | 6097(81.97) | 91846(77.86) | 14248(86.92) | 15478(69.00) | 88421(91.10) |
| Age |  |  |  |  |  |  |
| 35-39 | 437(1.25) | 111(1.49) | 7938(6.73) | 265(1.62) | 494(2.20) | 4560(4.70) |
| 40-44 | 633(1.82) | 216(2.90) | 7019(5.95) | 392(2.39) | 894(3.99) | 3906(4.02) |
| 45-49 | 1360(3.91) | 401(5.39) | 7755(6.57) | 787(4.80) | 1865(8.31) | 4635(4.78) |
| 50-54 | 3007(8.63) | 802(10.78) | 10325(8.75) | 1586(9.68) | 3729(16.62) | 6550(6.75) |
| 55-59 | 5071(14.56) | 1214(16.32) | 11965(10.14) | 2148(13.10) | 4482(19.98) | 7684(7.92) |
| 60-64 | 6722(19.30) | 1449(19.48) | 13367(11.33) | 2830(17.26) | 4791(21.36) | 8999(9.27) |
| 65-69 | 6742(19.36) | 1292(17.37) | 14471(12.27) | 2948(17.98) | 3366(15.00) | 10376(10.69) |
| 70+ | 10853(31.16) | 1953(26.26) | 45123(38.25) | 5436(33.16) | 2812(12.54) | 50345(51.87) |
| Urban/Rural |  |  |  |  |  |  |
| Urban | 29511(84.74) | 6144(82.60) | 74158(62.87) | 13985(85.32) | 18839(83.98) | 64489(66.45) |
| Rural | 5314(15.26) | 1294(17.40) | 43805(37.13) | 2407(14.68) | 3594(16.02) | 32566(33.55) |

SC: Spouse Control; DC: Disease Control; High: Senior High School and above; Low: Under Senior High School.

Table 2 Smoking stratified by urban/rural area and gender

| Smoking | Male | | | Female | | |
| --- | --- | --- | --- | --- | --- | --- |
| Case (%) | SC (%) | DC (%) | Case (%) | SC (%) | DC (%) |
| Total | 27956(80.28) | 4047(54.41) | 72479(61.44) | 6274(38.27) | 3240(14.44) | 13970(14.39) |
| Urban/Rural |  |  |  |  |  |  |
| Urban | 23607 (79.99) | 3232 (52.50) | 43870 (59.16) | 5822 (41.63) | 2920 (15.50) | 10950 (16.98) |
| Rural | 4349 (81.84) | 815 (62.98) | 28609 (65.31) | 452 (18.78) | 320 (8.90) | 3020 (9.27) |

Table 3 Odds Ratio (OR) and 95% Confidence Interval (CI) of different region, gender and age group

| Age | Urban | | | |  | Rural | | | |
| --- | --- | --- | --- | --- | --- | --- | --- | --- | --- |
| (95%CI) | | (95%CI) | |  | (95%CI) | | (95%CI) | |
| Male | Female | Male | Female |  | Male | Female | Male | Female |
| Total | 3.60(3.40, 3.82) | 3.88(3.69, 4.10) | 2.64(2.32, 3.02) | 2.37(2.03, 2.76) |  | 2.76(2.67, 2.85) | 3.48(3.35, 3.63) | 2,39(2.22, 2.57) | 2.26(2.03, 2.52) |
| 35-39 | 2.58(1.56, 4.27) | 1.60(0.71, 3.59) | 2.15(1.67, 2.77) | 1.84(0.96, 3.52) |  | 3.15(1.37, 7.26) | 4.68(0.91, 24.02) | 2.00(1.28, 3.14) | 2.71(1.13, 6.49) |
| 40-44 | 2.14(1.49, 3.09) | 3.42(2.13, 5.47) | 1.90(1.54, 2.34) | 3.07(2.11, 4.43) |  | 1.84(0.91, 3.71) | 1.30(0.49, 3.48) | 2.22(1.50, 3.30) | 1.91(0.85, 4.27) |
| 45-49 | 3.00(2.30, 3.91) | 3.18(2.48, 4.08) | 2.01(1.73, 2.34) | 3.13(2.52, 3.90) |  | 2.27(1.40, 3.68) | 1.46(0.80, 2.64) | 2.33(1.76, 3.07) | 1.70(1.03, 2.81) |
| 50-54 | 3.02(2.52, 3.63) | 3.71(3.20, 4.30) | 2.43(2.18, 2.71) | 3.25(2.84, 3.73) |  | 2.20(1.47, 3.31) | 2.57(1.60, 4.13) | 2.70(2.13, 3.43) | 1.68(1.16, 2.43) |
| 55-59 | 3.43(2.96, 3.97) | 3.49(3.08, 3.97) | 2.78(2.54, 3.05) | 3.45(3.06, 3.89) |  | 2.85(2.01, 4.06) | 3.40(2.27, 5.11) | 2.91(2.36, 3.58) | 2.52(1.86, 3.43) |
| 60-64 | 4.70(4.11, 5.37) | 4.35(3.88, 4.87) | 2.88(2.65, 3.13) | 3.87(3.49, 4.29) |  | 2.66(1.95, 3.61) | 1.76(1.27, 2.44) | 2.22(1.87, 2.64) | 2.05(1.57, 2.67) |
| 65-69 | 3.51(3.06, 4.03) | 3.71(3.29, 4.19) | 2.61(2.41, 2.83) | 3.25(2.94, 3.58) |  | 2.42(1.73, 3.39) | 2.80(1.92, 4.09) | 2.15(1.81, 2.58) | 2.33(1.80, 3.02) |
| 70+ | 3.82(3.43, 4.25) | 3.33(3.14, 4.01) | 2.65(2.51, 2.80) | 3.29(3.08, 3.50) |  | 3.38(2.59, 4.40) | 2.11(1.49, 3.00) | 1.99(1.74, 2.27) | 2.30(1.91, 2.78) |

: Odds Ratio of Spouse Control; : Odds Ratio of Disease Control.

Table 4 Accuracy evaluation indexes of cross-walking model

| Region | Gender | Model | Evaluation indexes | | | | | |
| --- | --- | --- | --- | --- | --- | --- | --- | --- |
|  |  |  | RMSE | MAE |  | AIC | BIC | *P*-value |
| Urban | Male |  | 0.35 | 0.30 | 0.40 | 11.90 | 12.10 | <0.001 |
|  |  |  | 0.39 | 0.34 | 0.42 | 11.80 | 11.90 | <0.001 |
|  |  |  | 0.10 | 0.09 | 0.12 | -7.78 | -7.54 | <0.001 |
|  |  | * | 0.10 | 0.09 | 0.11 | -9.73 | -9.57 | <0.001 |
|  | Female |  | 0.16 | 0.13 | 0.18 | -0.22 | 0.02 | <0.001 |
|  |  |  | 0.21 | 0.19 | 0.23 | 2.09 | 2.25 | <0.001 |
|  |  | * | 0.05 | 0.04 | 0.06 | -19.50 | -19.20 | <0.001 |
|  |  |  | 0.08 | 0.06 | 0.08 | -14.10 | -13.90 | <0.001 |
| Rural | Male |  | 0.46 | 0.40 | 0.53 | 16.30 | 16.50 | 0.49 |
|  |  |  | 0.66 | 0.55 | 0.71 | 20.2 | 20.30 | <0.001 |
|  |  |  | 0.18 | 0.15 | 0.21 | 1.26 | 1.50 | 0.48 |
|  |  | * | 0.27 | 0.22 | 0.28 | 5.50 | 5.65 | <0.001 |
|  | Female |  | 0.64 | 0.51 | 0.74 | 21.70 | 21.90 | <0.05 |
|  |  |  | 0.77 | 0.66 | 0.82 | 22.50 | 22.60 | <0.001 |
|  |  |  | 0.27 | 0.22 | 0.32 | 7.98 | 8.22 | <0.05 |
|  |  | * | 0.30 | 0.27 | 0.32 | 7.24 | 7.40 | <0.001 |

*: Models were selected for adjusting. RMSE: Root Mean Squared Error; MAE: Mean Absolute Error; AIC: Akaike's Information Criteria; BIC: Bayesian information criteria. The lower the above four indexes, the better the model fit.
